# Supplementary material
Source: PubMed Central journal article supplement (PMC5330764)
Supplement: NIHMS406505-supplement-1.pdf [file NIHMS406505-supplement-1.pdf]

## Supplementary Figure 1

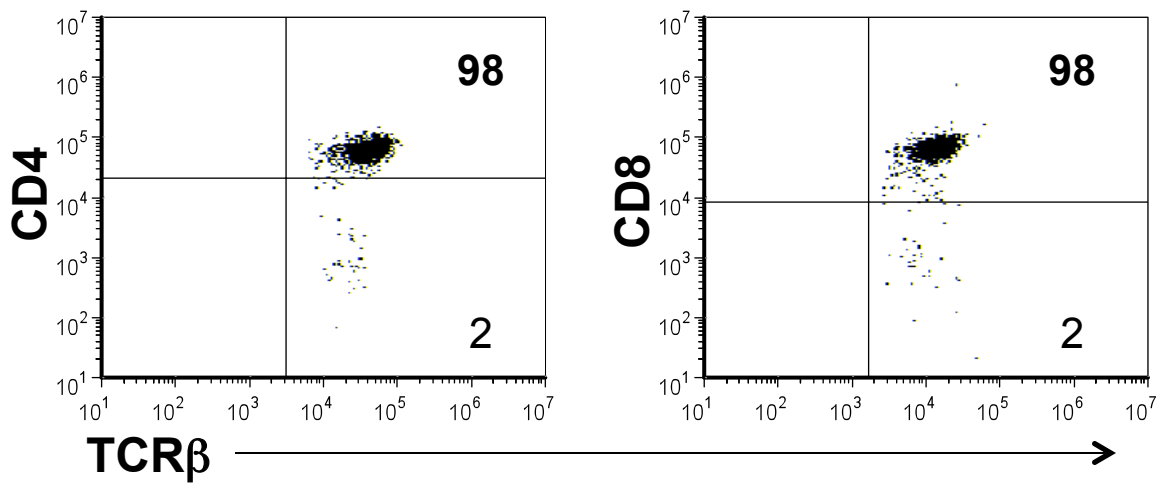

### Supplementary Figure 1. Isolation of CD4<sup>+</sup> or CD8<sup>+</sup> C57BL/6 T cells.

Splenocytes from a C57BL/6 mouse were harvested and either CD4<sup>+</sup> or CD8<sup>+</sup> T cells were isolated using the CD4<sup>+</sup> T Cell Isolation Kit II or CD8<sup>α</sup><sup>+</sup> T Cell Isolation Kit II from Miltenyi. Isolated T cells were then stained with anti-TCRβ and anti-CD4 or anti-CD8<sup>α</sup> antibodies. Dot plots are representative of all isolations (>4) performed through the course of these experiments.

## Supplementary Figure 2

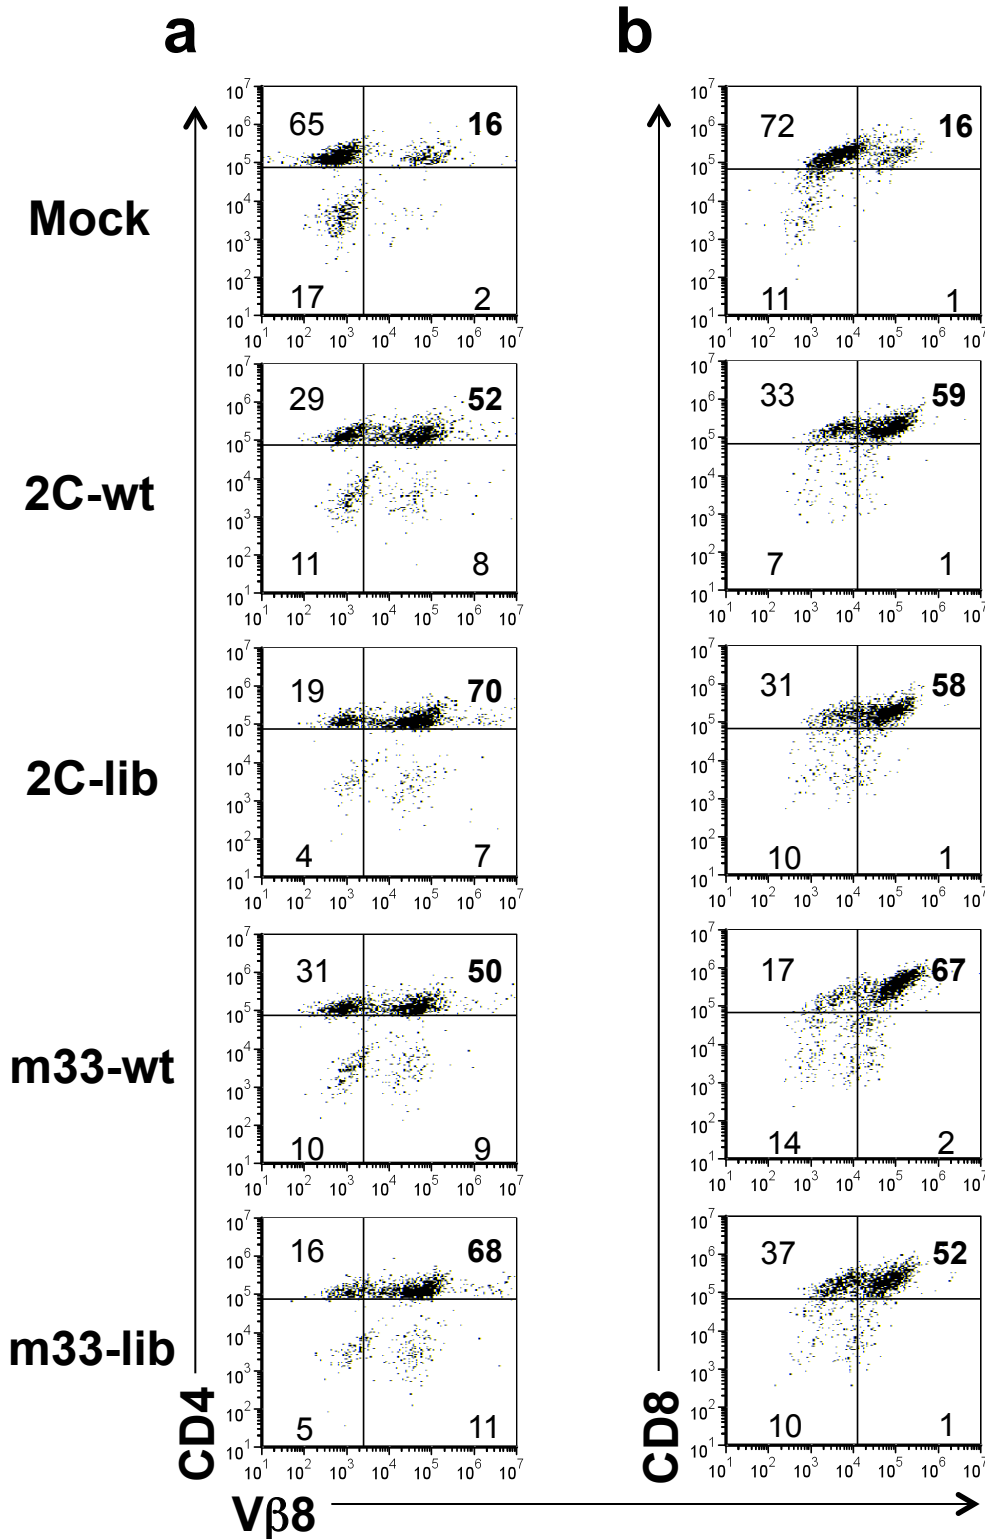

**Supplementary Figure 2. Characterization of transduced CD4<sup>+</sup> or CD8<sup>+</sup> T cells before adoptive transfer into tumor-bearing mice.** (a) CD4<sup>+</sup> or (b) CD8<sup>+</sup> T cells 3 days post-transduction were stained with anti-Vβ8.1/8.2:PE and anti-CD4:647 or anti-CD8α:647. Dot plots are representative of transductions (>4) performed throughout the course of experiments. Transduced T cells were also stained with the 2C clonotypic antibody 1B2 or SIY/K<sup>b</sup> Ig dimer to confirm transgene expression.

## Supplementary Figure 3

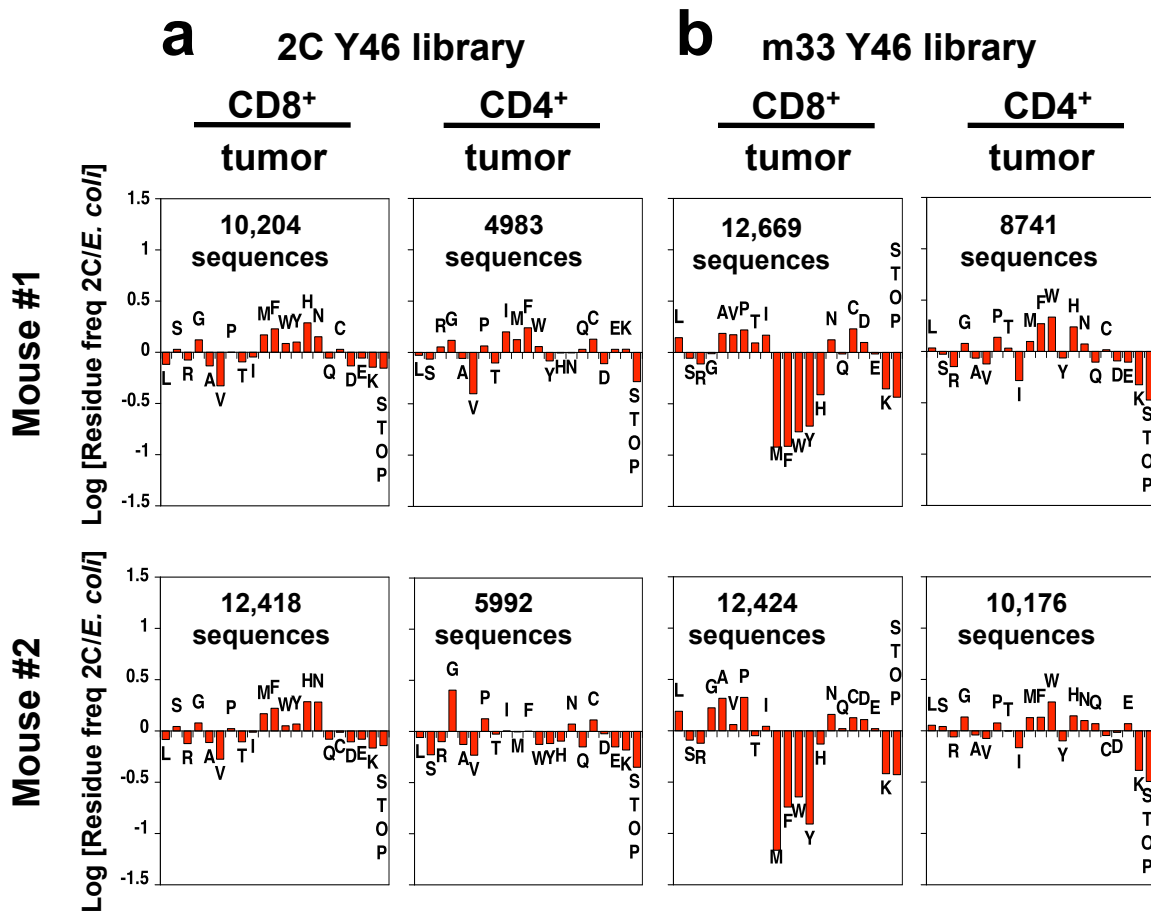

**Supplementary Figure 3. Frequencies of TCR 46 $\beta$  residues in TCR library-transduced T cells isolated from tumor and other tissues (*in vivo* selection).** (a-b) Relative frequencies of TCR 46 $\beta$  residues isolated from B16 SIY<sup>+</sup> tumors in mice treated with CD8<sup>+</sup> (left panels) or CD4<sup>+</sup> (right panels) T cells transduced with the (a) 2C or (b) m33 libraries. Individual mice are shown, and the number of sequences analyzed for each sample is indicated. (c-d) Relative frequencies of TCR 46 $\beta$  residues for T cells isolated from the draining lymph node (first and third columns) or spleen (second and fourth columns) of B16 SIY<sup>+</sup> tumor-bearing mice treated with CD8<sup>+</sup> (left two columns) or CD4<sup>+</sup> (right two columns) T cells transduced with (c) the 2C TCR library, or (d) the m33 TCR library. Individual mice are shown, and the number of sequences analyzed for each sample is indicated.

# Supplemental Figure 3

**C**

2C Y46 library

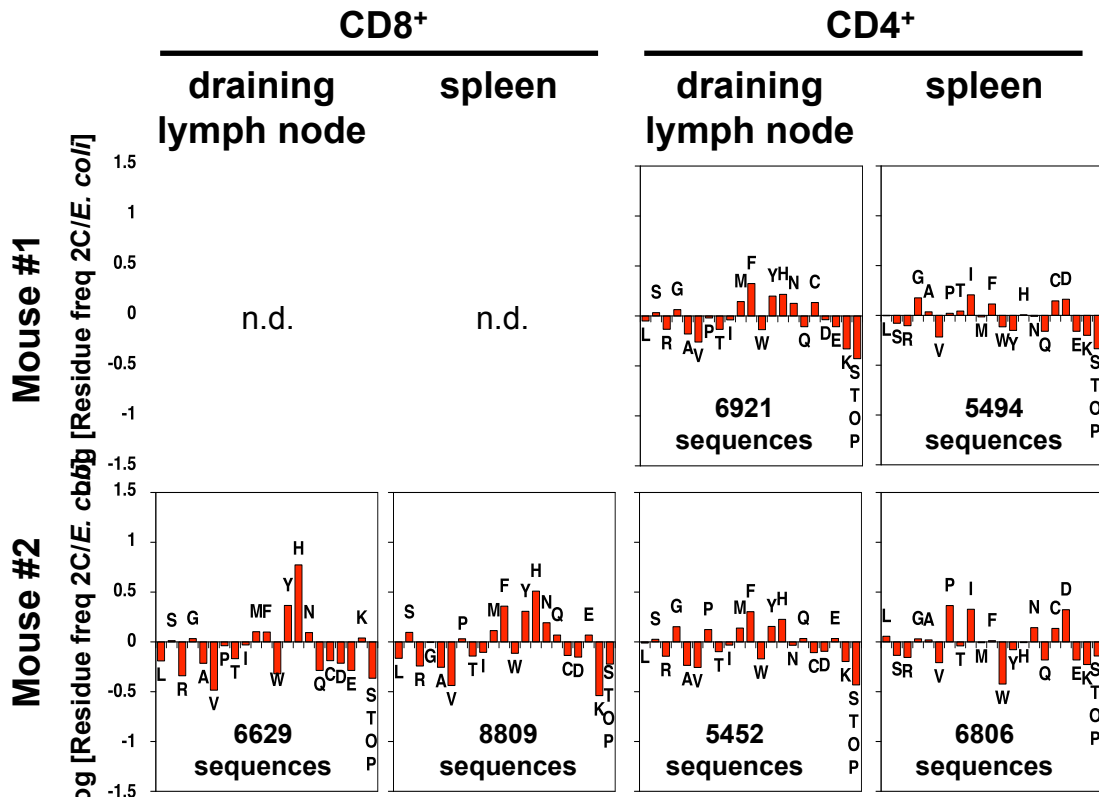

**d**

m33 Y46 library

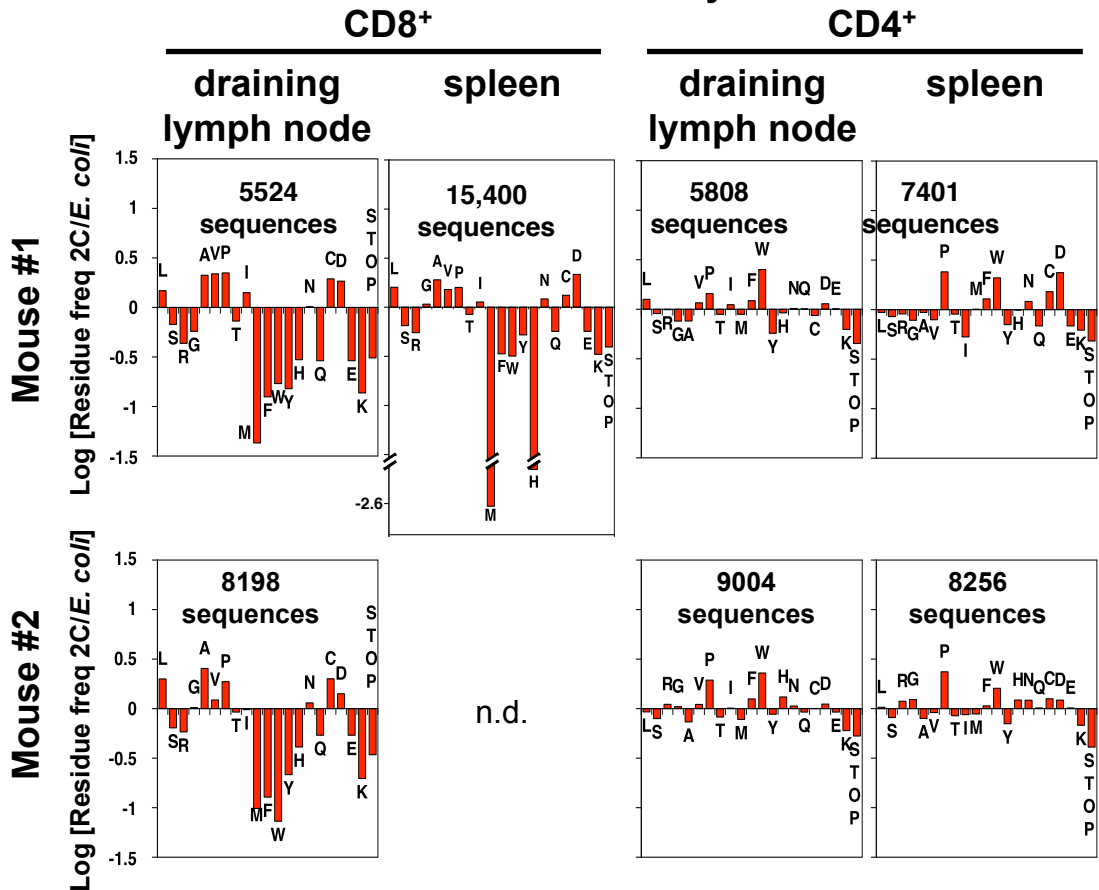

# Supplementary Figure 4

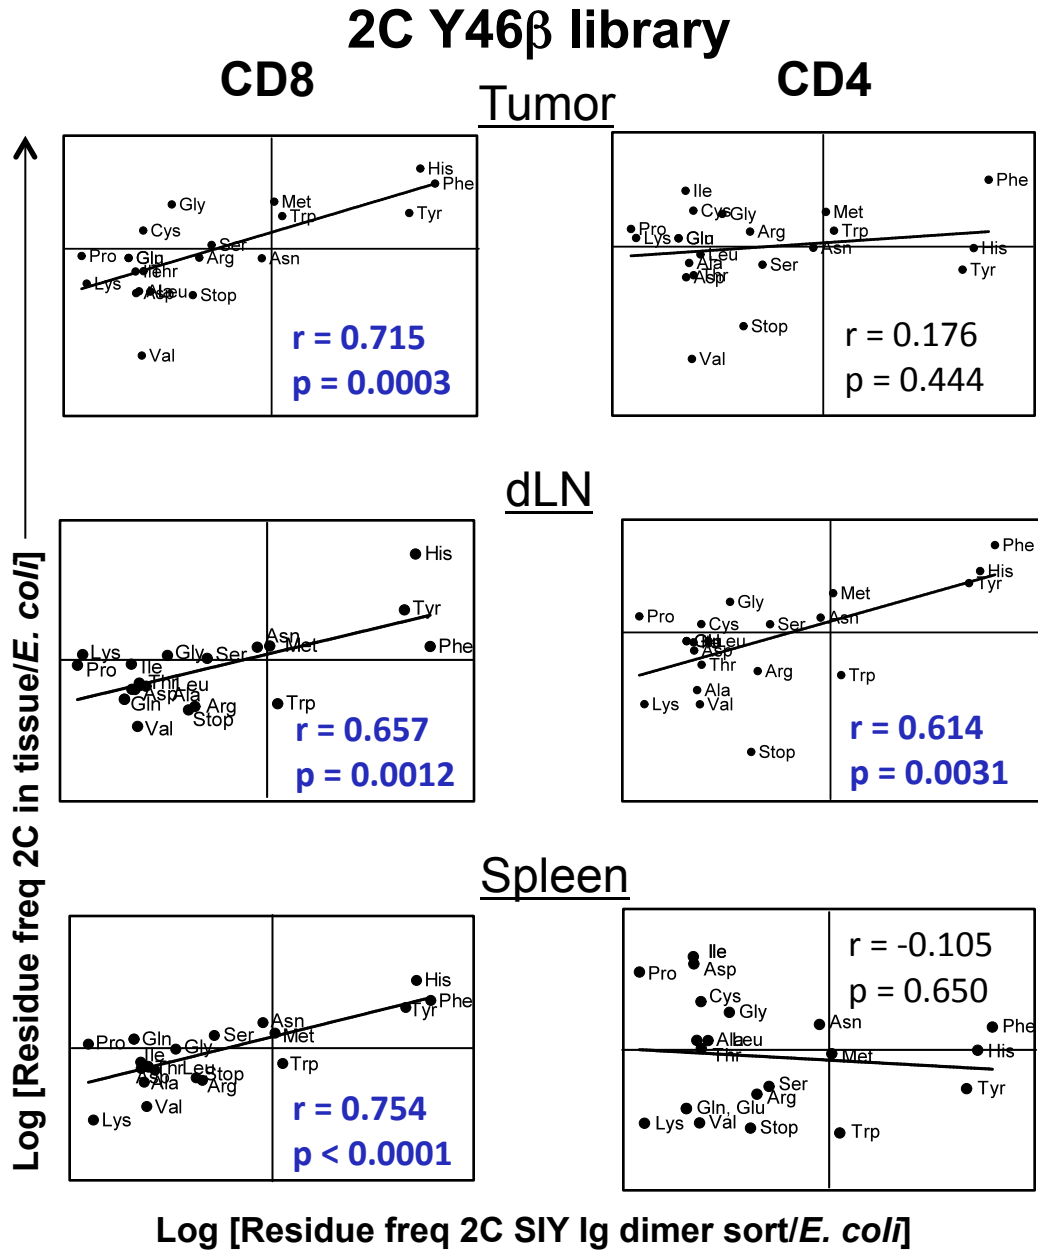

**Supplementary Figure 4. Correlation between 46 $\beta$  residues isolated *in vitro* and *in vivo* from 2C-library.** Residue frequency (taken from Figure 2c) at 46 $\beta$  from 58<sup>-/-</sup> T cells sorted *in vitro* with SIY/K<sup>b</sup>-Ig dimer (x-axis) plotted against residue frequency (taken from Figure 4a,b) at 46 $\beta$  from primary T cells obtained from SIY<sup>+</sup> tumors, spleens or draining lymph nodes (y-axis). Frequencies were plotted in GraphPad Prism 5 and analyzed by linear regression to calculate probability of the slope being significantly different from zero. Plots with bolded blue font represent significant p values.

# Supplementary Figure 5

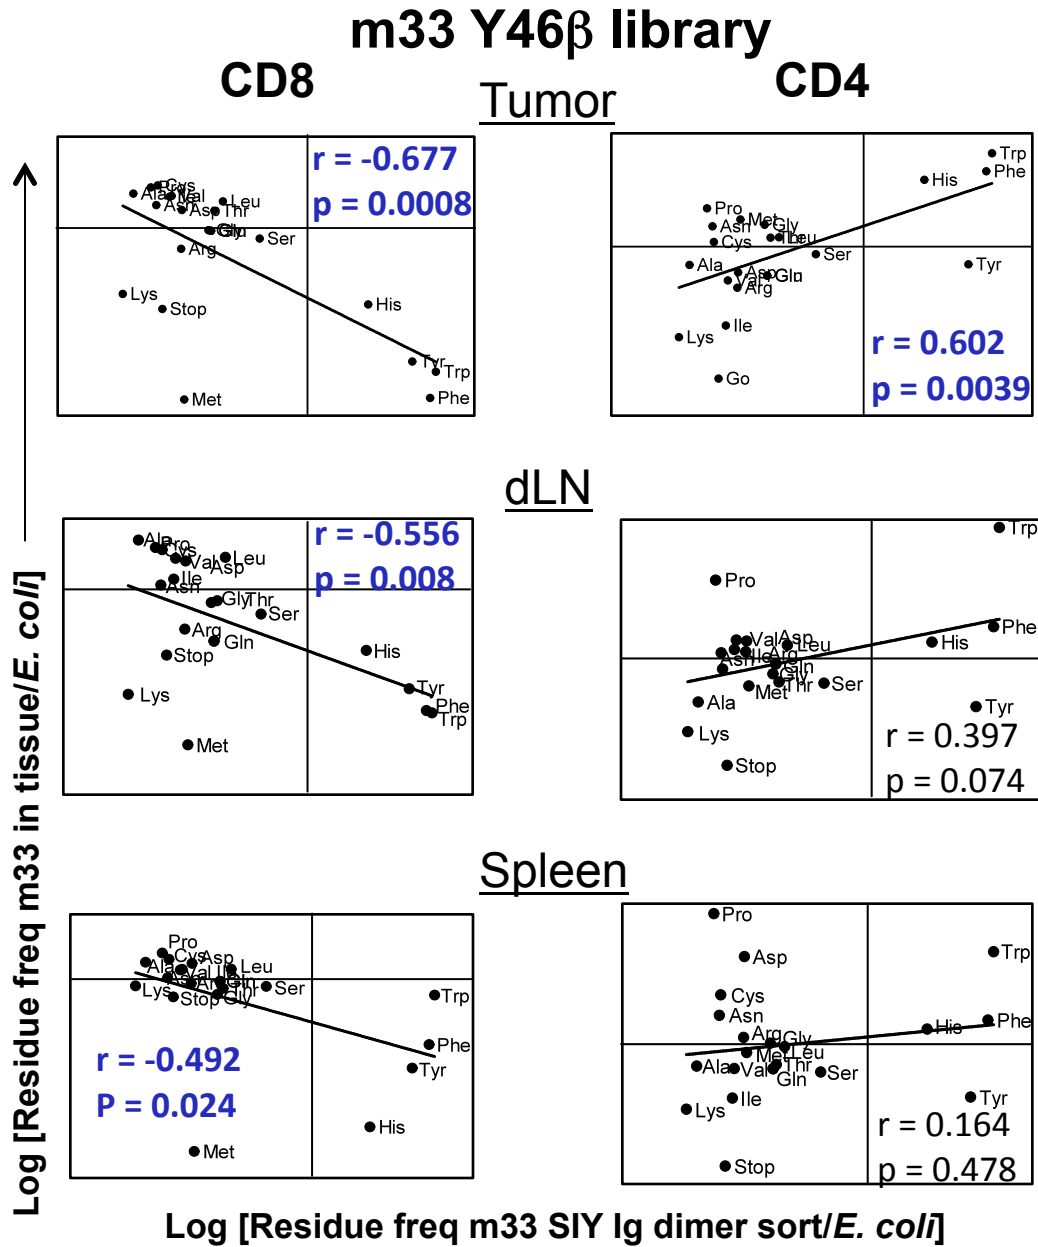

**Supplementary Figure 5. Correlation between 46 $\beta$  residues isolated *in vitro* and *in vivo* from m33-library.** Residue frequency (taken from Figure 2c) at 46 $\beta$  from 58<sup>-/-</sup> T cells sorted *in vitro* with SIY/K<sup>b</sup>-Ig dimer plotted against residue frequency (taken from Figure 4a,b) at 46 $\beta$  from primary T cells obtained from SIY<sup>+</sup> tumors, spleens or draining lymph nodes. Frequencies were plotted in GraphPad Prism 5 and analyzed by linear regression to calculate probability of the slope being significantly different from zero. Plots with bolded blue font represent significant p values.
